# Supplementary material for: The gut microbiota suppresses insulin-mediated fat accumulation via the short-chain fatty acid receptor GPR43
Source: PubMed Central journal article supplement — Nat Commun. 2013 May 7;4:1829–. doi: 10.1038/ncomms2852 (PMC3674247; doi:10.1038/ncomms2852), 2013-05-07
Supplement: ncomms2852-s1.pdf [file ncomms2852-s1.pdf]

## Supplementary Figure 1

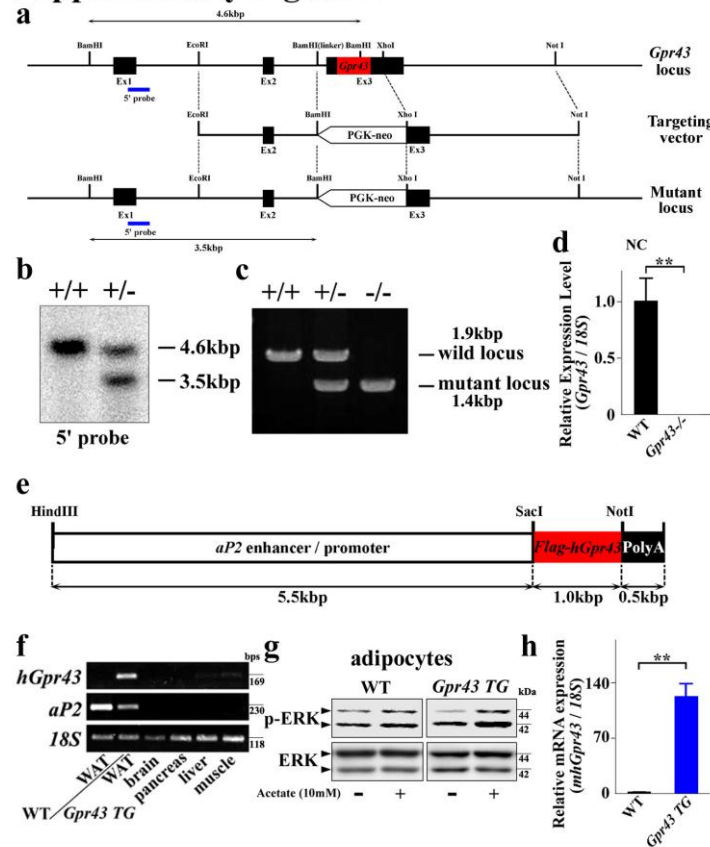

### Supplementary Figure S1 | Targeted disruption and overexpression of *Gpr43* in mice.

(a) A targeting vector was constructed by ligation of 3 fragments: the 5' and 3' homology recombination arms and a fragment of the LacZ-PGK-neo cassette. A 1.6-kb fragment of mouse DNA containing the exon coding for *Gpr43* was replaced with the LacZ-PGK-neo cassette. The linearized targeting vector was then electroporated into 129/Sv ES cells. (b) The 5' probe used for Southern blotting is indicated below the map of the target allele. The 4.6-kb and 3.5-kb fragments, which corresponded to the wild-type and mutant alleles, respectively, were detected by Southern blotting of genomic DNA digested with *Bam* HI. (c) Genotypes of mice were determined by PCR using the 3 primers: P1, P2, and P3 (wild-type allele: 1.9-kb, P1/P3; mutant allele, 1.3-kb, P1/P2). P1: 5'-AAGGGAACCGATCACAGCTA-3', P2: 5'-CGGCATAACAGTGGAGACAA-3', P3: 5'-GGCTATTCGGCTATGACTGG-3' (d) Expression of *Gpr43* mRNA in mouse adipose tissues of wild-type and *Gpr43*<sup>-/-</sup> mice. *18S* rRNA expression was used as an internal control. (e) Schematic representation of the *aP2* promoter fused with human *Gpr43* cDNA. (f) Expression of the transgene *hGpr43* mRNA in the WAT of *aP2-Gpr43*<sup>TG</sup> mice. (g) GPR43 signaling in the adipocytes of *aP2-Gpr43*<sup>TG</sup> mice. (h) Total *Gpr43* mRNA expression in the adipose tissue of wild-type and *aP2-Gpr43*<sup>TG</sup> mice. *18S* rRNA expression was used as an internal control. (d, h) Data are presented as mean±s. e. m. Student's *t*-test; \*\**p* < 0.005.

## Supplementary Figure 2

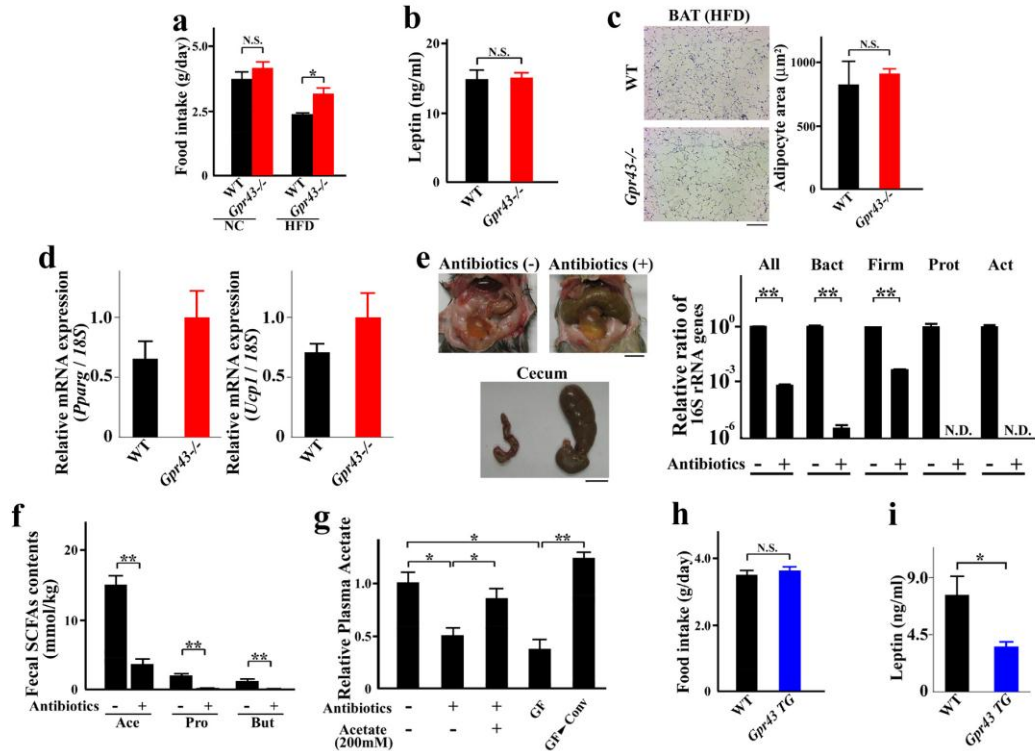

### Supplementary Figure S2 | Phenotype of *Gpr43*<sup>-/-</sup> and *aP2-Gpr43TG* mice, and under antibiotic treatment and germ-free (GF) conditions.

(a) Food intake of NC- and HFD-fed *Gpr43*<sup>-/-</sup> mice (n = 7-8). (b) Plasma leptin concentration in HFD-fed *Gpr43*<sup>-/-</sup> mice (n = 5,7). (c) H&E stained brown adipocyte tissue (BAT) and mean area of adipocytes of *Gpr43*<sup>-/-</sup> mice fed an HFD (n = 4,3). Scale bar = 100  $\mu$ m. (d) Expression of *Pparg* and *Ucp1* mRNA in the BAT of *Gpr43*<sup>-/-</sup> mice fed an HFD (n = 3). (e) Gross cecal appearance of mice under antibiotic treatment, and comparison of microbial communities under antibiotic treatment, as assessed by qPCR (n = 4). All, all bacteria; Bact, Bacteroidetes; Firm, Firmicutes; Prot, gamma-proteobacteria; Act, actinobacteria. (n = 8). Scale bar = 1 cm. (f) Fecal major short-chain fatty acid contents in HFD-fed mice under antibiotic treatment (n = 8). (g) Plasma acetate level with or without acetate, under antibiotic treatment, under GF conditions, or under CONV conditions after GF conditions (n = 3-8). (h) Food intake of *aP2-Gpr43TG* mice (n = 6). (i) Plasma leptin level in *aP2-Gpr43TG* mice (n = 5). All mice were analyzed at 16 weeks of age. All data are presented as mean  $\pm$  s. e. m. Student's *t*-test (a-f, h, and i) and ANOVA followed by Tukey-Kramer's *post hoc* test (g); \**p* < 0.05; \*\**p* < 0.005.

### Supplementary Figure 3

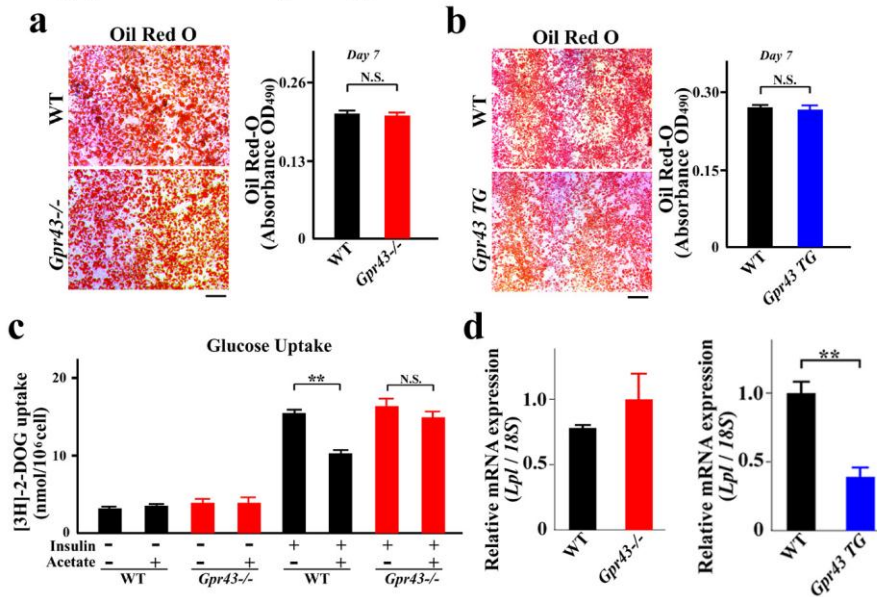

#### Supplementary Figure S3 | Adipocytes and adipose tissues of *Gpr43*<sup>-/-</sup> and *aP2-Gpr43TG* mice.

(a, b) Oil Red O staining of mouse embryonic fibroblast (MEF)-derived adipocytes of *Gpr43*<sup>-/-</sup> and *aP2-Gpr43TG* mice with treatment of pioglitazone (10 μM) and inducer (n = 4). Scale bar = 100 μm. (c) Effect of acetate on glucose uptake in adipose tissues from wild-type and *Gpr43*<sup>-/-</sup> mice (n = 3). (d) Expression of *Lpl* mRNA in the WAT in *Gpr43*<sup>-/-</sup> mice fed an HFD (n = 4) and *aP2-Gpr43TG* (n = 4) mice. Mice were analyzed at 16 weeks of age. All data are presented as mean ± s. e. m. Student's *t*-test; \*\**p* < 0.005.

## Supplementary Figure 4

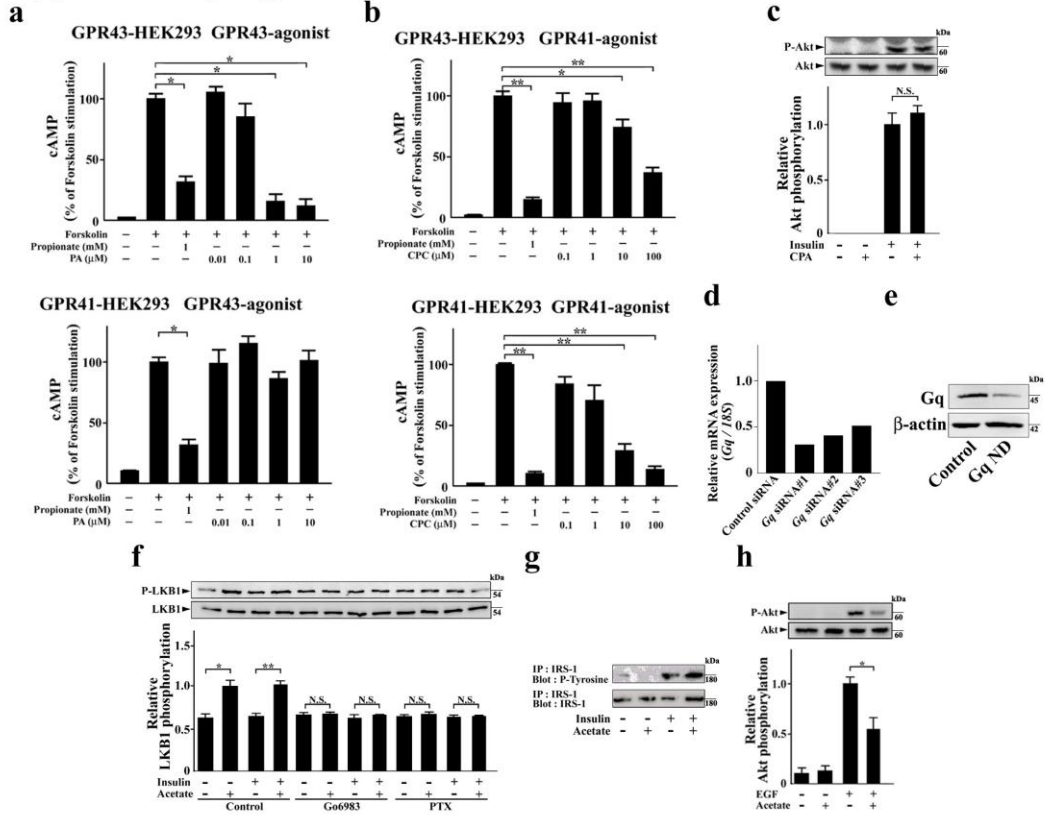

## Supplementary Figure S4 | GPR43 cell signaling.

(a, b) Reduction in the cAMP level in response to GPR43 agonist (phenylacetamide; PA) (a) and GPR41 agonist (cyclopropanecarboxylic acid; CPC) (b) treatment in GPR43- and GPR41-expressing HEK293 cells (n = 3). (c) Effects of CPA (N<sup>6</sup>-cyclopentyladenosine) on insulin-induced Akt phosphorylation in 3T3-L1-derived adipocytes (n = 4). Cells were stimulated with insulin (3 μg/ml) in the presence of CPA (100 nM) for 5 min after pretreatment with CPA for 2 h. (d) Efficiencies of siRNA knockdown in 3T3-L1 cells. (e) Effects of siRNA knockdown on protein expression in 3T3-L1 cells. (f) Effects of GPR43 stimulation on LKB1 phosphorylation in 3T3-L1-derived adipocytes (n = 3). Cells were stimulated with or without insulin (3 μg/ml) in the presence of acetate (10mM), Go6983 (10 μM), or PTX (1 μg/ml) for 5 min after pretreatment with acetate for 2 h, Go6983 or PTX for 4 h. (g) Effects of GPR43 stimulation on IRS1 phosphorylation in 3T3-L1-derived adipocytes (n = 3). Cells were stimulated with or without insulin (3 μg/ml) in the presence of acetate (10mM), for 5 min after pretreatment with acetate for 2 h. IP; immunoprecipitation. (h) Effects of acetate on EGF-induced Akt phosphorylation in 3T3-L1-derived adipocytes (n = 3). Cells were stimulated with EGF (10 ng/ml) in the presence of acetate (10 mM) for 5 min after pretreatment with acetate for 2 h. All data are presented as mean±s. e. m. ANOVA followed by Tukey-Kramer's *post hoc* test; \**p* < 0.05; \*\**p* < 0.005.

## Supplementary Figure 5

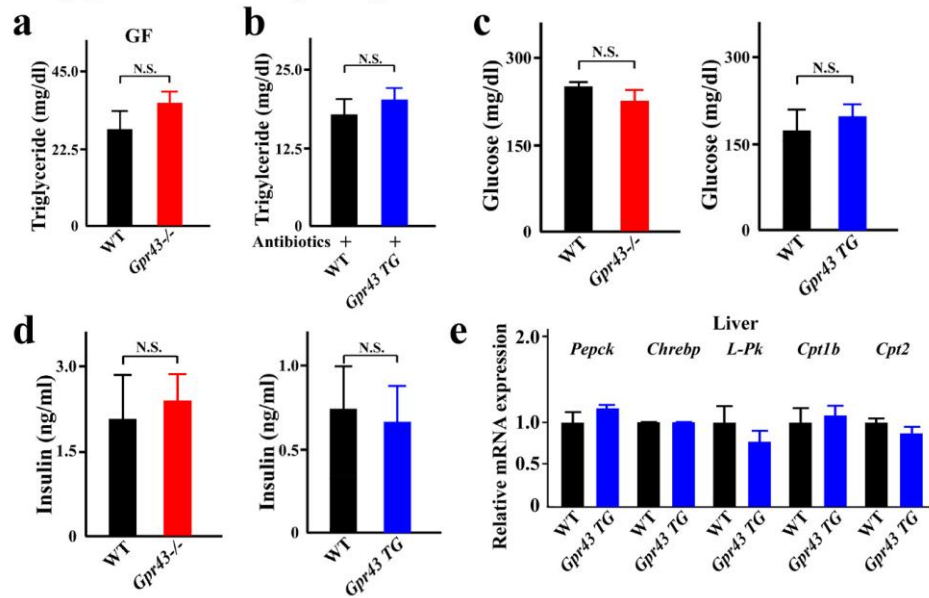

### Supplementary Figure S5 | Biochemical parameters of *Gpr43*<sup>-/-</sup> and *aP2-Gpr43TG* mice and qRT-PCR analysis of the liver of *aP2-Gpr43TG* mice.

(a) Plasma triglycerides in *Gpr43*<sup>-/-</sup> mice fed an HFD under GF conditions (n = 4,6). (b) Plasma triglycerides in *aP2-Gpr43TG* mice treated with antibiotics (n = 7,6). (c) Plasma glucose concentration in *Gpr43*<sup>-/-</sup> mice fed an HFD (n = 9,8) and *aP2-Gpr43TG* mice (n = 5). (d) Plasma insulin concentration in *Gpr43*<sup>-/-</sup> mice (n = 11,6) fed an HFD and *aP2-Gpr43TG* mice (n = 9, 8). (e) mRNA levels of genes involved in gluconeogenesis (*Pepck*), glycolysis (*Chrebp* and *L-pk*), and beta-oxidation (*Cpt1b* and *Cpt2*) in the liver of *aP2-Gpr43TG* mice fed an HFD (n = 4). All mice were analyzed at 15-16 weeks of age. All data were statistically analyzed by Student's *t*-test and are presented as mean ± s. e. m.

## Supplementary Figure 6

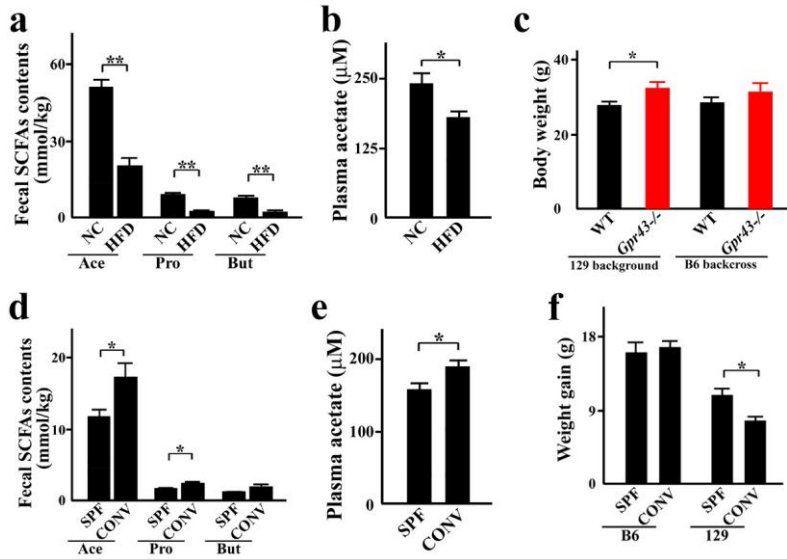

### Supplementary Figure S6 | The impact of differences in diet, genetic backgrounds and gut microbiota on the phenotype of the mice.

(a) Fecal major short-chain fatty acid contents in NC- and HFD-fed mice (n=4). Ace, acetate; Pro, propionate; But, butyrate. (b) Plasma acetate concentration in NC- and HFD-fed mice (n = 4). Mice were analyzed at 13 weeks of age (a, b). (c) Body weight of wild-type and *Gpr43*<sup>-/-</sup> mice fed an HFD in 129/SvEv (129) background or C57BL/6 (B6) backcross (n = 5-8) mice at the age of 8 weeks. (d) Fecal major short-chain fatty acid content in specific pathogen-free (SPF) or conventional (CONV) mice fed an HFD (n = 8). Ace, acetate; Pro, propionate; But, butyrate. CONV, a colony housed under conventional condition; SPF, a colony housed under SPF conditions. (e) Plasma acetate concentration in SPF or CONV mice fed an HFD (n = 8). (f) Weight gain (between 5-13 weeks of age) in B6 and 129 mice. All data are presented as mean±s. e. m. Student's *t*-test; \**p* < 0.05; \*\**p* < 0.005.

**Supplementary Table S1 | Composition of diets.**

|                                   | <b>NC (MF)</b> | <b>HFD (58Y1)</b> |
|-----------------------------------|----------------|-------------------|
| <b>Energy (kcal/g)</b>            | <b>3.6</b>     | <b>5.1</b>        |
| <b>Fat (% of energy)</b>          | <b>12.8</b>    | <b>61.6</b>       |
| <b>Carbohydrate (% of energy)</b> | <b>61.5</b>    | <b>20.3</b>       |
| <b>Protein (% of energy)</b>      | <b>25.7</b>    | <b>18.1</b>       |
| <b>Carbohydrate (% by weight)</b> | <b>54.4</b>    | <b>25.9</b>       |
| <b>Fiber (% by weight)</b>        | <b>2.8</b>     | <b>6.5</b>        |

Supplementary Table S2 | Primers used for PCR.

| Primer                | Forward                         | Reverse                         |
|-----------------------|---------------------------------|---------------------------------|
| <i>Gpr43</i> (mouse)  | 5'-GGCTTCTACAGCAGCATCTA-3'      | 5'-AAGCACACCAGGAAATTAAG-3'      |
| <i>Gpr41</i> (mouse)  | 5'-GTGACCATGGGGACAAGCTTC-3'     | 5'-CCCTGGCTGTAGGTTGCATT-3'      |
| <i>Pparg2</i> (mouse) | 5'-GCTGTTATGGGTGAAACTCTGG-3'    | 5'-TTCTTGTAAGTGCTCATAGGC-3'     |
| <i>C/ebpa</i> (mouse) | 5'-AAGAAGTCGGTGGACAAGAACAG-3'   | 5'-GTTGCGTTGTTTGGCTTTATCTC-3'   |
| <i>C/ebpb</i> (mouse) | 5'-GACTACGCAACACACGTGTAAC-3'    | 5'-CAAAACCAAAAACATCAACAACCC-3'  |
| <i>aP2</i> (mouse)    | 5'-GATGCCTTTGTGGGAACCTGG-3'     | 5'-CTGTCGTCTGCGGTGATTTTC-3'     |
| <i>Leptin</i> (mouse) | 5'-TGCTCCAGCAGCTGCAAGGT-3'      | 5'-GAAGAATGTCTGCAGAGAG-3'       |
| <i>Adipoq</i> (mouse) | 5'-TCCTGCTTTGGTCCCTCCAC-3'      | 5'-TCTCCAGCCCCACACTGAAC-3'      |
| <i>F4/80</i> (mouse)  | 5'-GCCTGGACGAATCCTGTGAA-3'      | 5'-GCTAGATGCAAAGCCAGGGT-3'      |
| <i>TNFa</i> (mouse)   | 5'-GGCAGGTCTACTTTGGAGTC-3'      | 5'-TCGAGGCTCCAGTGAATTCG-3'      |
| <i>18S</i> (mouse)    | 5'-CTCAACACGGGAAACCTCAC-3'      | 5'-AGACAAATCGCTCCACCAAC-3'      |
| <i>Pgc1a</i> (mouse)  | 5'-GAGAATGAGGCAAACCTGCTAGCG -3' | 5'-TGCATGGTTCTGAGTGCTAAGACC -3' |
| <i>Pepck</i> (mouse)  | 5'-CCACAGCTGGTGCAGAACA-3'       | 5'-GAAGGGTCGATGGCAAA-3'         |
| <i>Hk1</i> (mouse)    | 5'-AGGAAGAACCAACCCACAAAAC-3'    | 5'-ACCCCAAGGAAACACCACTC-3'      |
| <i>Pkm2</i> (mouse)   | 5'-GGAGATGTGGTCATTGTGCTG-3'     | 5'-AAAGGATAGGGGAGGGGAAG-3'      |
| <i>Hk2</i> (mouse)    | 5'-GGAGGAGATGCGTAATGTGG-3'      | 5'-TGCCAGGGTTGAGAGAGAG-3'       |
| <i>Cpt1b</i> (mouse)  | 5'-ACCACAAAGGTCGCTTCTTC-3'      | 5'-TCTTCATCCAGGGTCACAAAG-3'     |
| <i>Cpt2</i> (mouse)   | 5'-CTCATCCGCTTTGTTCCTTC-3'      | 5'-AGTTCATCACGACTGGGTTTG-3'     |
| <i>Gpr43</i> (human)  | 5'-TCTGCTACTGGCGTTTGTG-3'       | 5'-CAGGGGCTTTTCTCTGGTG-3'       |
| <i>Lpl</i> (mouse)    | 5'-CTGCTGGCGTAGCAGGAAGT-3'      | 5'-GCTGGAAAGTGCCTCCATTG-3'      |



|                       |                             |                            |
|-----------------------|-----------------------------|----------------------------|
| <i>Chrebp</i> (mouse) | 5'-CTGGGGACCTAAACAGGAGC-3'  | 5'-GAAGCCACCCTATAGCTCCC-3' |
| <i>L-Pk</i> (mouse)   | 5'-GAGTCGGAGGTGAAAATTGTG-3' | 5'-GTCCACCCACACTGTCTTTG-3' |
| <i>Gq</i> (mouse)     | 5'-TGGAGAAGGTGTCTGCTTTTG-3' | 5'-ATTCCCGTCGTCTGTCGTAG-3' |

**Supplementary Table S3 | Primers used for fecal microbiota qRT-PCR.**

| <b>Primer</b>           | <b>Forward</b>                  | <b>Reverse</b>             |
|-------------------------|---------------------------------|----------------------------|
| <i>Universal</i>        | 5'-ACTCCTACGGGAGGCAGCAGT-3'     | 5'-ATTACCGCGGCTGCTGGC-3'   |
| <i>Bacteroidetes</i>    | 5'-CRAACAGGATTAGATACCT-3'       | 5'-GGTAAGGTTCTCGCGTAT-3'   |
| <i>Firmicutes</i>       | 5'-GGAGYATGTGGTTTAATTCGAAGCA-3' | 5'-AGCTGACGACAACCATGCAC-3' |
| <i>g-Proteobacteria</i> | 5'-TCGTCAGCTCGTGTGTYGTGA-3'     | 5'-CGTAAGGGCCATGATG-3'     |
| <i>Actinobacteria</i>   | 5'-TACGGCCGCAAGGCTA-3'          | 5'-TCRTCCCCACCTTCCTCCG-3'  |

**Supplementary Table S4 | siRNA used for RNAi.**

| <b>siRNA</b> | <b>Sequence</b>                 |
|--------------|---------------------------------|
| <i>Gq #1</i> | 5'-UUGUUGUGUAGGCAGAUAGGAAGGG-3' |
| <i>Gq #2</i> | 5'-AAAUGACACUUUGUAAGUCAAGGG-3'  |
| <i>Gq #3</i> | 5'-AGAACUUGAUCAUUUCGCUAAGCG-3'  |

## Supplementary Methods

**Biochemical analyses** The plasma leptin concentrations were measured using the Leptin Mouse ELISA Kit (R&D Systems). Plasma insulin concentrations were measured using the Insulin ELISA Kit (Shibayagi, Japan).

**Oil red O staining of adipocytes** Cultured cells were fixed with 4% paraformaldehyde for 30 min at 4°C and washed with 60% isopropyl alcohol. Fixed cells were stained with oil red O staining solution (0.3% oil red O in 60% isopropyl alcohol) for 20 min at room temperature, washed with 60% isopropyl alcohol, and then washed several times with distilled water. Finally, the stained cells were destained with isopropanol and the optical density (OD) at 490 nm was measured by spectrophotometry.

**Generation of HEK293 cells expressing mouse GPR43 or GPR41** Flp-In T-REx HEK293 cells were transfected with a mixture of mouse FLAG-GPR43 or FLAG-GPR41 cDNA in pcDNA5/FRT/TO and pOG44, respectively, using the Lipofectamine reagent (Invitrogen). After 48 h, the medium was exchanged to medium supplemented with 200 µg/ml hygromycin B to initiate selection of stably transfected cells. Following isolation of resistant cells, expression of GPR43 or GPR41 from the Flp-In locus was induced by treatment with 1 µg/ml doxycycline for 48 h as described previously<sup>14</sup>. Expression of GPR43 or GPR41 was confirmed by RT-PCR and FACS Calibur (BD Biosciences) using the FLAG-tag.

**cAMP determination** The cells were lysed with 0.1N HCl. After acetylation, the cAMP level was determined in duplicate using an Enzyme Immunoassay Kit (Cayman).

**Detection of phosphorylation of IRS1** Cells were lysed with 1 mL lysis buffer containing 50 mM Hepes (pH 7.5), 150 mM NaCl, 1 mM EGTA, 1% Nonidet P-40, and 0.25% sodium deoxycholate, Protease and Phosphatase Inhibitor Cocktail (Nacalai Tesque). The cell lysates were centrifuged at 20,400 x g for 20 min. Anti-IRS-1 antibody (Cell Signaling Technology; rabbit, 1:1000) was pre-bound to Protein A Dynabeads (Life Technologies) according to manufacturer's protocol. The supernatant was incubated with the Protein A Dynabeads with gentle rocking for 2h at 4°C. The beads were collected using a magnetic stand and were washed 3 times with lysis buffer. To release the IRS-1 protein, the beads were boiled in 30 ul premixed NuPAGE LDS Sample Buffer and Reducing Agent (Life Technologies) at 70°C for 10 min. Proteins were separated by NuPAGE Novex 4-12% Bis-Tris Gel in MES-SDS Running Buffer (Life Technologies) and immunoblotted with an anti-IRS-1 and anti-Phospho-Tyrosine (Cell Signaling Technology; rabbit, 1:2000).
